# Supplementary figures and images for: Sperm competition and the evolution of sperm design in mammals
Source: Springer Nature journal article supplement (doi:10.1186/1471-2148-11-12), 2011-01-13

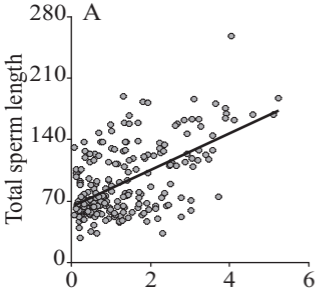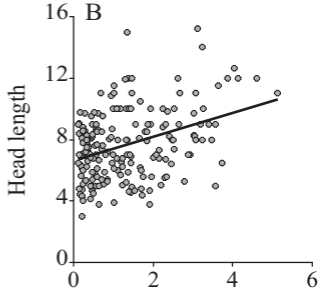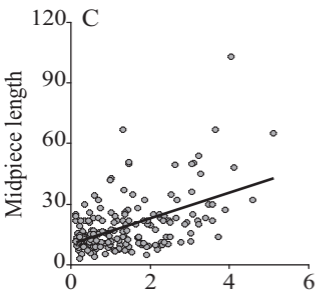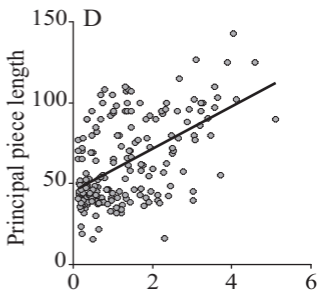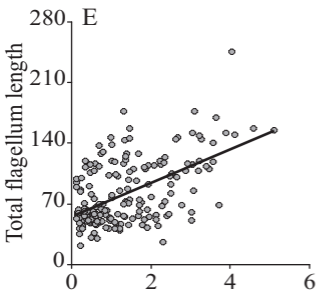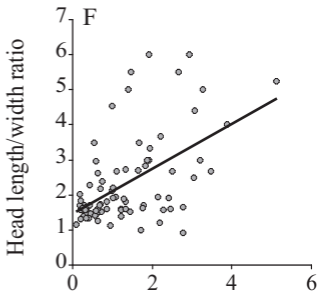

Relative testes mass

Supplement: 12862_2010_1621_MOESM7_ESM.pdf [file 12862_2010_1621_MOESM7_ESM.pdf]

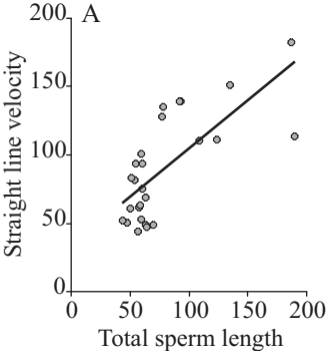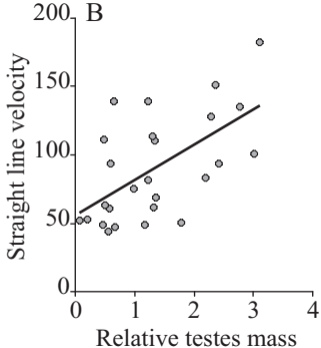

Supplement: 12862_2010_1621_MOESM8_ESM.pdf [file 12862_2010_1621_MOESM8_ESM.pdf]

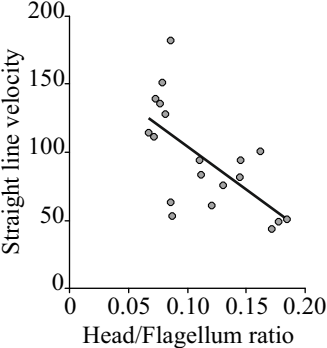

Supplement: 12862_2010_1621_MOESM9_ESM.pdf [file 12862_2010_1621_MOESM9_ESM.pdf]
